# Supplementary material for: Sex-Specific Association of Body Mass Index with Hippocampal Subfield Volume and Cognitive Function in Non-Demented Chinese Older Adults
Source: MDPI journal article supplement (doi:10.3390/brainsci14020170), 2024-02-08
Supplement: s1 [file s1]

## *Supplementary Material*

**Supplementary Table S1.** Multivariate regression models assessing the association between BMI and hippocampal subfield volumes.

| Model                           | Hippocampal subfields | $\beta$ (95% CI)      | $t$   | $p$           | Adjusted $R^2$<br>( $p$ -value) |
|---------------------------------|-----------------------|-----------------------|-------|---------------|---------------------------------|
| Overall-unadjusted <sup>1</sup> | Fissure               | 4.210 (−0.326, 8.747) | 1.854 | 0.068         | 0.036 (0.068)                   |
| Female-unadjusted <sup>1</sup>  | Fissure               | 9.100 (2.994, 15.206) | 3.032 | <b>0.005*</b> | 0.194 (0.005)                   |
| Overall-adjusted <sup>2</sup>   | Fissure               | 4.559 (0.209, 8.908)  | 2.097 | <b>0.040*</b> | 0.253 (0.000)                   |
| Female-adjusted <sup>2</sup>    | Fissure               | 7.732 (1.206, 14.258) | 2.420 | <b>0.022*</b> | 0.173 (0.045)                   |

Model 1 unadjusted

Model 2 includes age, education, and eTIV as covariates.

The  $p$ -values with “\*” indicate a significant correlation.

**Supplementary Table S2** Multivariate regression models assessing the association between BMI and cognitive functions in females.

| Model                          | Cognitive functions | $\beta$ (95% CI)        | $t$    | $p$           | Adjusted $R^2$<br>( $p$ -value) |
|--------------------------------|---------------------|-------------------------|--------|---------------|---------------------------------|
| Female-unadjusted <sup>1</sup> | Coding              | −1.505 (−3.038,0.029)   | −1.996 | 0.054         | 0.081 (0.054)                   |
|                                | Story recall        | −0.162 (−0.498,0.174)   | −0.983 | 0.333         | −0.001 (0.333)                  |
|                                | RBANS total score   | −0.936 (−2.631,0.758)   | −1125  | 0.269         | 0.008 (0.269)                   |
| Female-adjusted <sup>2</sup>   | Coding              | −0.367 (−0.674, −0.060) | −2.438 | <b>0.021*</b> | 0.320 (0.003)                   |
|                                | Story recall        | −1.794 (−3.447, −0.141) | −2.216 | <b>0.034*</b> | 0.131 (0.083)                   |
|                                | RBANS total score   | −1.741 (−3.380, −1.101) | −2.168 | <b>0.038*</b> | 0.244 (0.014)                   |

Model 1 unadjusted

Model 2 includes age, education, and CMMSE as covariates.

The  $p$ -values with “\*” indicate a significant correlation.
